# Supplementary material for: Bond Behavior of FRP Bars in Lightweight SCC under Direct Pull-Out Conditions: Experimental and Numerical Investigation
Source: MDPI journal article supplement (doi:10.3390/ma15103555), 2022-05-16
Supplement: s1 [file s1]

## **Supplementary Materials**

### **Main input data**

Table S1: Summary of material model and material properties of concrete used in the model.

|                                                           | LW0%                              | LW100%                    |
|-----------------------------------------------------------|-----------------------------------|---------------------------|
| Material model                                            | 3D Nonlinear Cementitious 2 Model |                           |
| Elastic Modulus                                           | 42.31 GPa                         | 38.4 MPa                  |
| Poisson's ratio                                           | 0.2                               | 0.2                       |
| Tensile strength                                          | 4 MPa                             | 3 MPa                     |
| Compressive strength (cube)                               | 78 MPa                            | 56 MPa                    |
| Compressive strength (cylinder)                           | 66.3 MPa                          | 47.6 MPa                  |
| Specific Fracture Energy ( $G_f$ )                        | 109.5 N/m                         | 87.82 N/m                 |
| Critical compressive displacement ( $w_d$ )               | $-5 \times 10^{-4}$ m             | $-5 \times 10^{-4}$ m     |
| Plastic strain at compressive strength $\varepsilon_{cp}$ | $-1.567 \times 10^{-3}$ m         | $-1.239 \times 10^{-3}$ m |
| Type of tension softening                                 | Exponential                       |                           |
| Crack Model                                               | Fixed                             |                           |

Table S2: Summary of material model and material properties of embedded reinforcement bar.

|                           | Steel B500B   | GFRP     | BFRP   |
|---------------------------|---------------|----------|--------|
| Material model            | Reinforcement |          |        |
| Material type             | Bilinear      | Linear   | Linear |
| Elastic Modulus           | 200 GPa       | 55.5 GPa | 70 GPa |
| Yield strength $\sigma_y$ | 500           |          |        |
| Hardening                 | Linear        |          |        |

Table S3: Material properties of bond.

| Material type | Bond for reinforcement |
|---------------|------------------------|
| Function      | Multi-linear           |

Table S4: Solution parameters in FEM model.

|                      |                        |
|----------------------|------------------------|
| Solution Method      | Newton-Raphson         |
| Stiffness/update     | Tangent/each iteration |
| Number of iterations | 30                     |
| Error tolerance      | 0.01                   |
| Line search          | On, with iterations    |
